# Supplementary material for: Structure and thermal property relationships in the thermomaterial di-n-butylammonium tetrafluoroborate for multipurpose cooling and cold-storage
Source: Royal Society of Chemistry journal article supplement (doi:10.1039/d3ta04063a), 2023-01-01
Supplement: d3ta04063a1.pdf [file d3ta04063a1.pdf]

## ELECTRONIC SUPPLEMENTARY INFORMATION

### Structure and thermal properties relationships in the thermomaterial di-n-butylammonium tetrafluoroborate for multipurpose cooling and cold-storage

Javier García-Ben<sup>a,‡</sup>, Juan Manuel Bermúdez-García<sup>a,‡</sup>, Richard J. C. Dixey<sup>b</sup>, Ignacio Delgado-Ferreiro<sup>a</sup>, Antonio Luis Llamas-Saiz<sup>c</sup>, Jorge López-Beceiro<sup>d</sup>, Ramón Artiaga<sup>d</sup>, Alberto García-Fernández<sup>e</sup>, Ute B. Cappel<sup>e</sup>, Bruno Alonso<sup>f</sup>, Socorro Castro-García<sup>a</sup>, Anthony E. Phillips<sup>b</sup>, Manuel Sánchez-Andújar<sup>a\*</sup> and María Antonia Señaris-Rodríguez<sup>a\*\*</sup>

<sup>a</sup> University of A Coruña, QUIMOLMAT Group, Dpt. Chemistry, Faculty of Science and Centro Interdisciplinar de Química e Bioloxía (CICA), Zapateira, 15071 A Coruña, Spain.

<sup>b</sup> School of Physical and Chemical Sciences, Queen Mary University of London, London, E1 4NS UK.

<sup>c</sup> Research Infrastructures Area, X-ray Unit, University of Santiago de Compostela, 15782 Santiago de Compostela, Spain.

<sup>d</sup> Universidade da Coruña, Campus Industrial de Ferrol, CITENI-Grupo Proterm, Campus de Esteiro, 15403 Ferrol, Spain.

<sup>e</sup> Division of Applied Physical Chemistry, Department of Chemistry, KTH Royal Institute of Technology, SE-100 44 Stockholm, Sweden.

<sup>f</sup> ICGM, CNRS, Université de Montpellier, ENSCM, 34095 Montpellier Cedex 5, France.

<sup>‡</sup> These authors have equally contributed to this work.

E-mail: [m.andujar@udc.es](mailto:m.andujar@udc.es), [m.señaris.rodriguez@udc.es](mailto:m.señaris.rodriguez@udc.es)

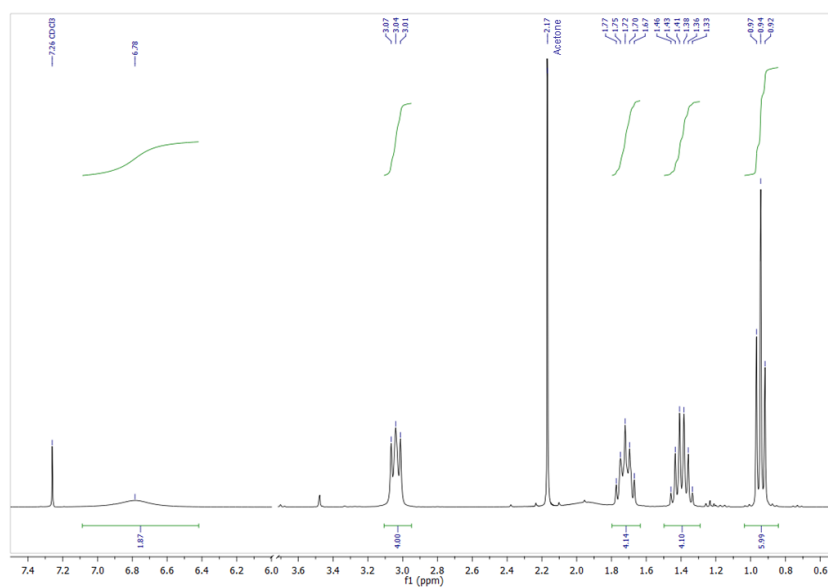

**Fig. S1** Liquid  $^1\text{H}$ -NMR of  $[\text{DBA}][\text{BF}_4]$  in  $\text{CDCl}_3$ .

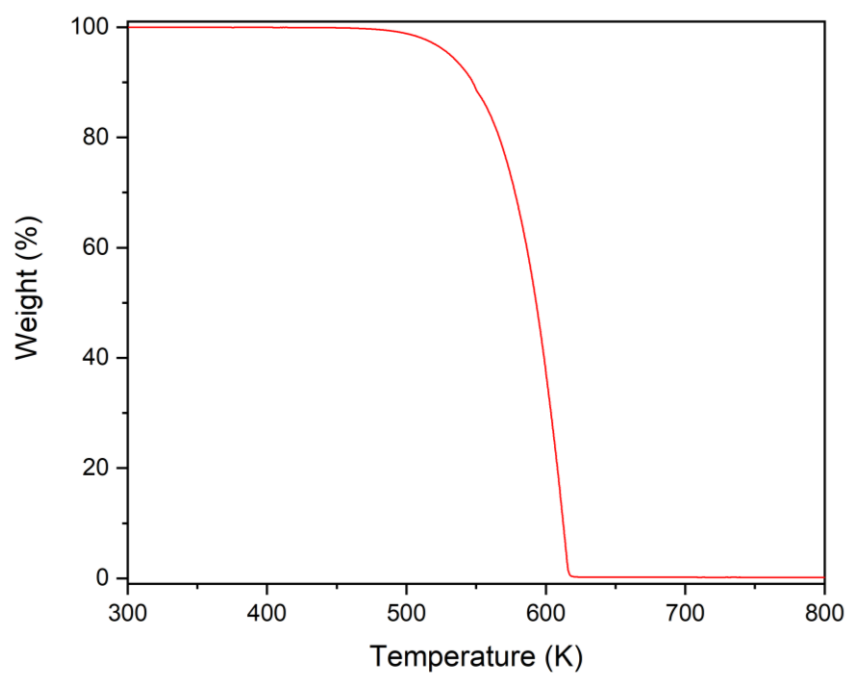

**Fig. S2** Thermogravimetric analysis of  $[\text{DBA}][\text{BF}_4]$  under  $\text{N}_2$  atmosphere.

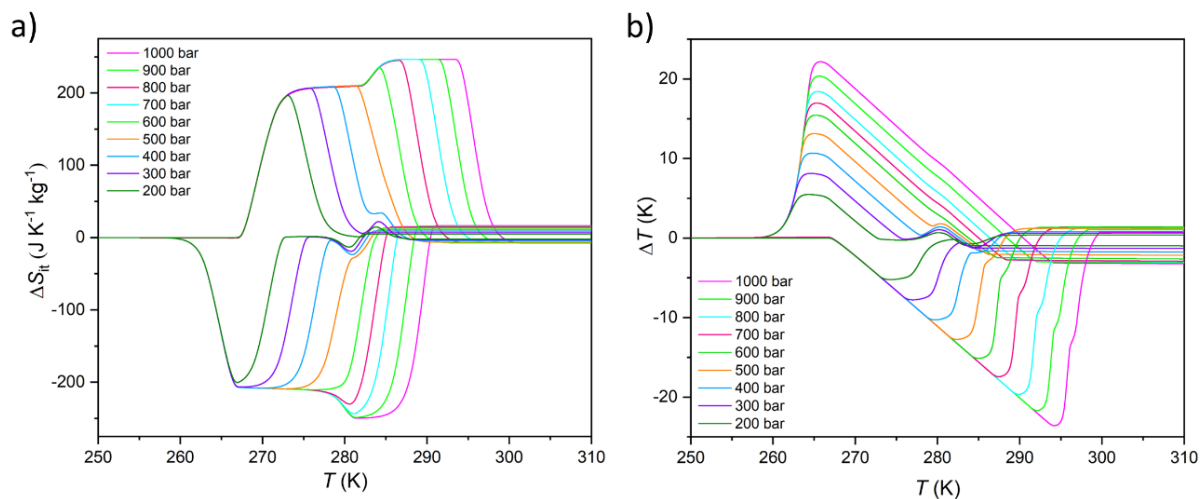

**Fig. S3** a) Pressure-driven isothermal entropy changes on applying ( $0 \rightarrow p$ ) and removing ( $p \rightarrow 0$ ) pressure. b) Reversible adiabatic temperature changes on applying ( $0 \rightarrow p$ ) and removing ( $p \rightarrow 0$ ) pressure at different pressures.

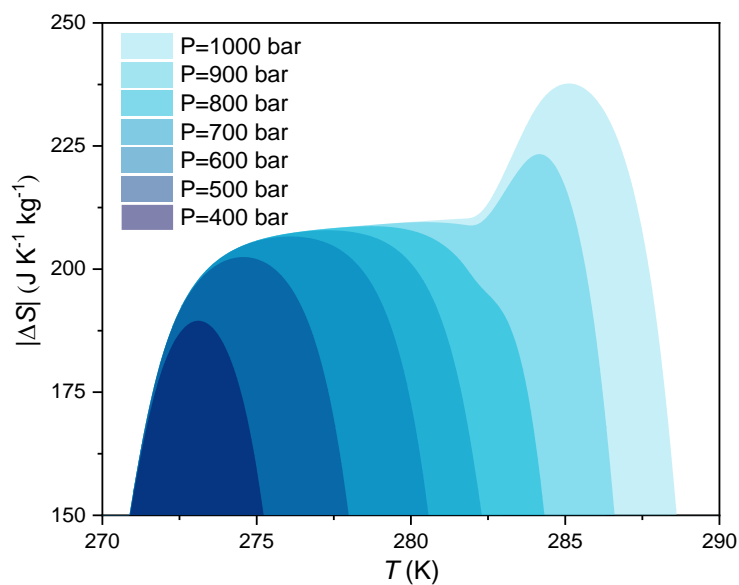

**Fig. S4** Maximum reversible isothermal entropy changes of the ( $0 \rightarrow p$ ) curves at different pressures as a function of temperature.

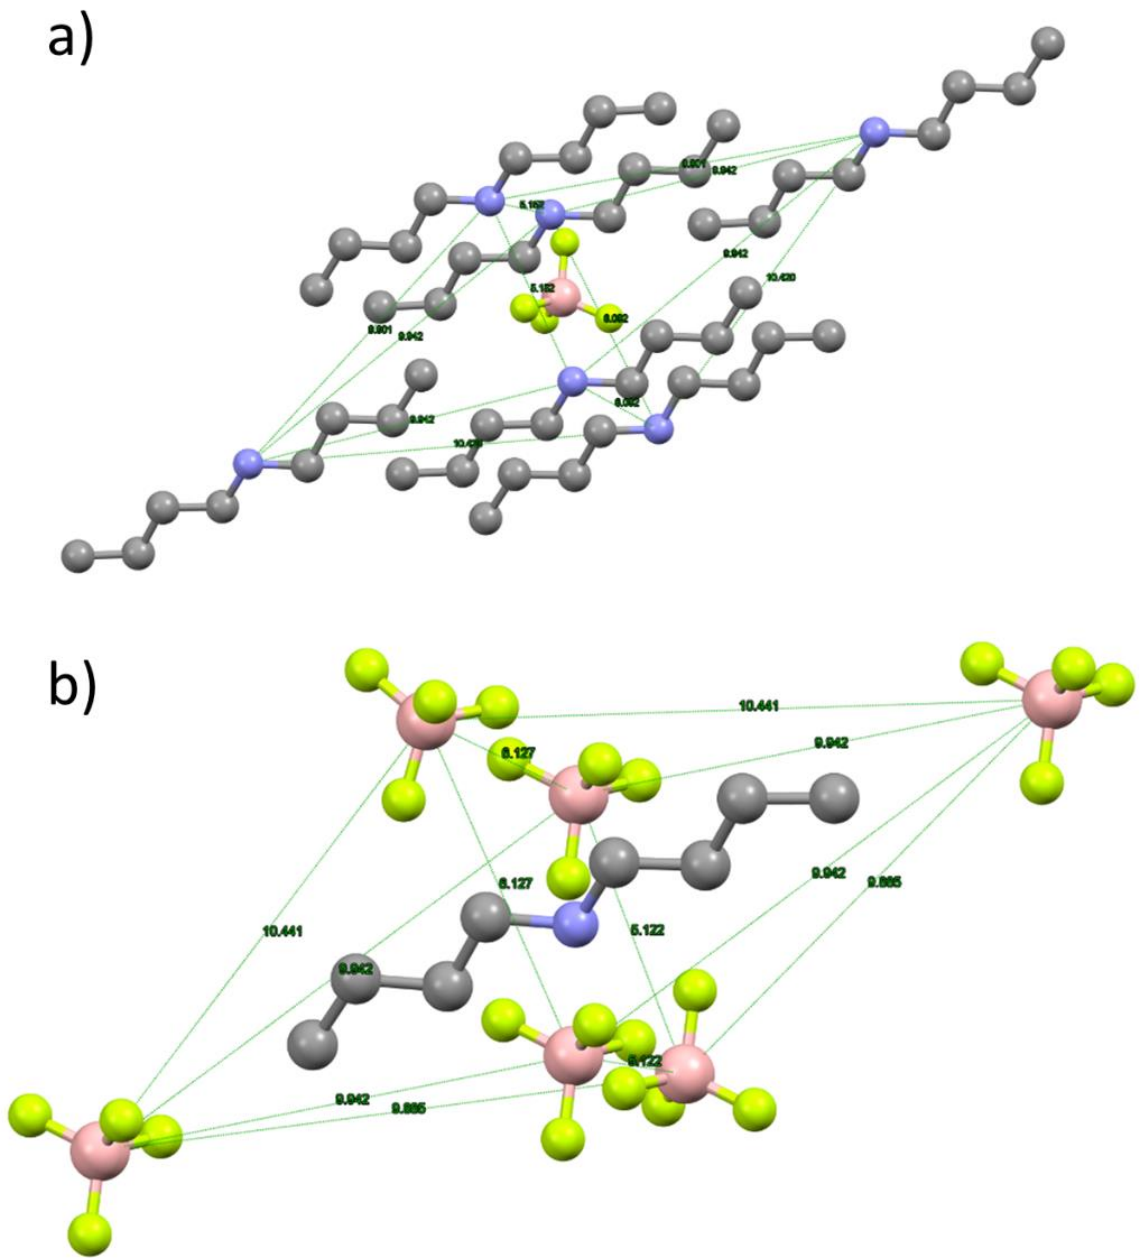

**Fig. S5** Coordination environment of a)  $\text{BF}_4^-$  and b)  $\text{DBA}^+$  in phase IV at  $T = 100$  K.

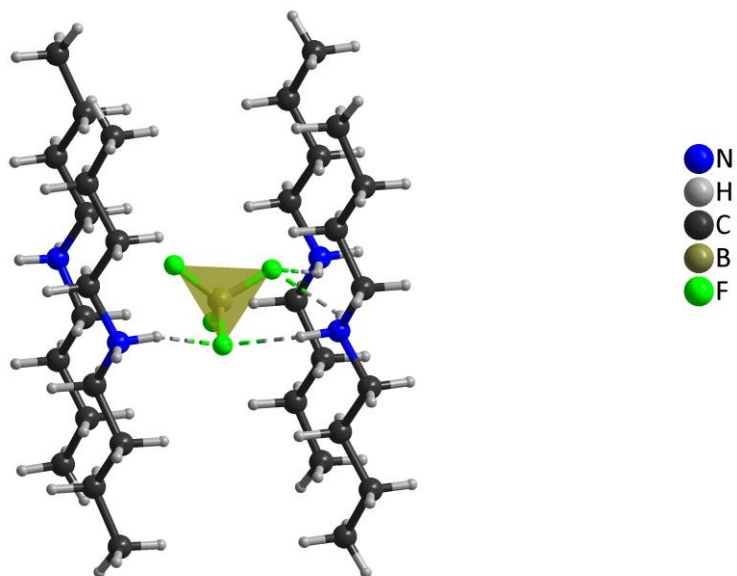

**Fig. S6** H-Bonds of each [BF<sub>4</sub>]<sup>-</sup> molecule in phase IV at  $T = 100$  K.

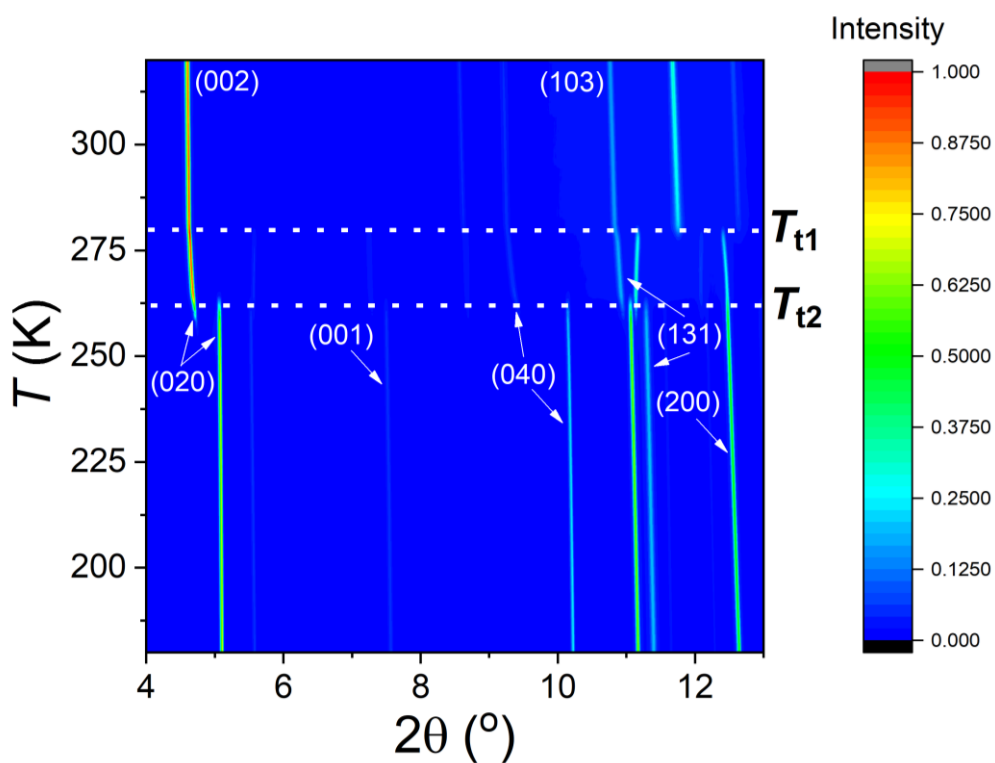

**Fig. S7** SPXRD patterns of [DBA][BF<sub>4</sub>] as a function of temperature ( $180 \text{ K} < T < 320 \text{ K}$ ).

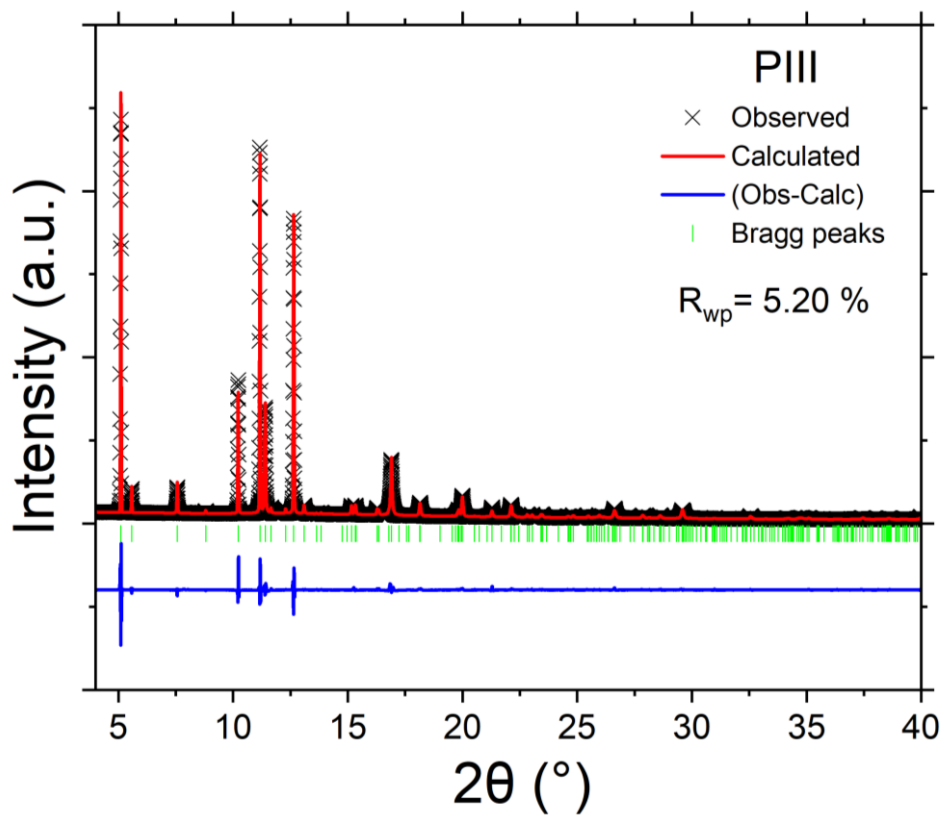

Fig. S8 Le Bail refinement of phase III of [DBA][BF<sub>4</sub>] at  $T = 180$  K.

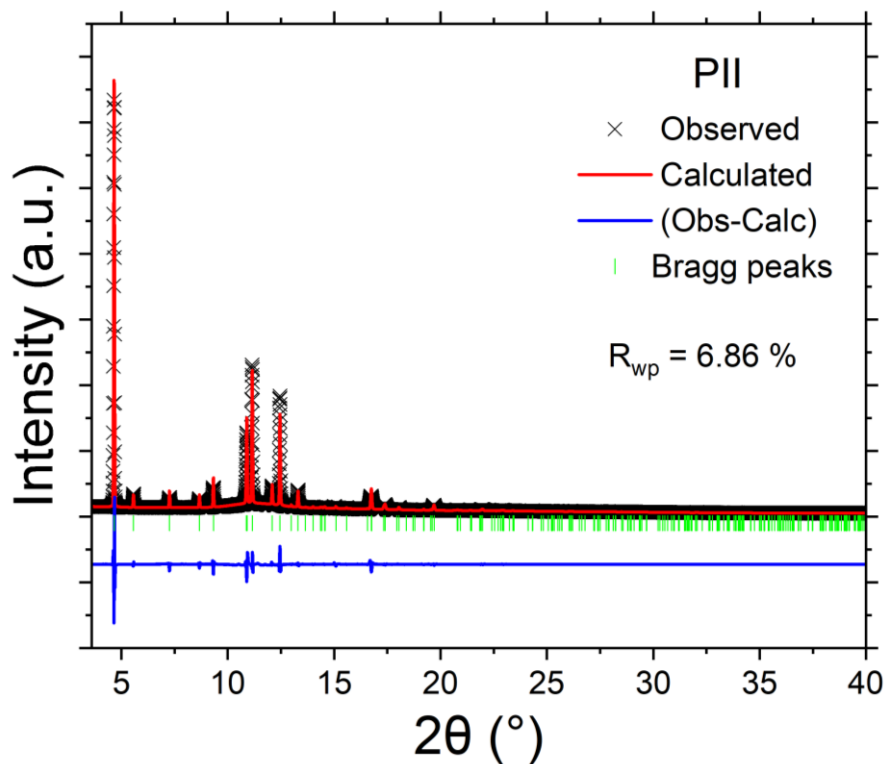

Fig. S9 Le Bail refinement of phase II of [DBA][BF<sub>4</sub>] at  $T = 270$  K.

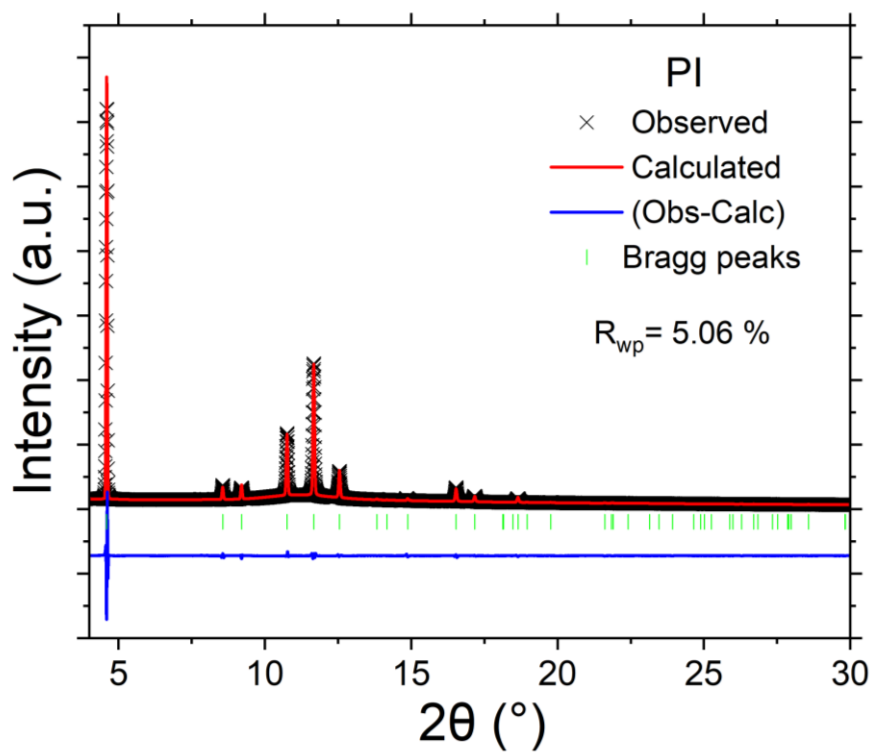

**Fig. S10** Le Bail refinement of phase I of [DBA][BF<sub>4</sub>] at  $T = 320$  K.

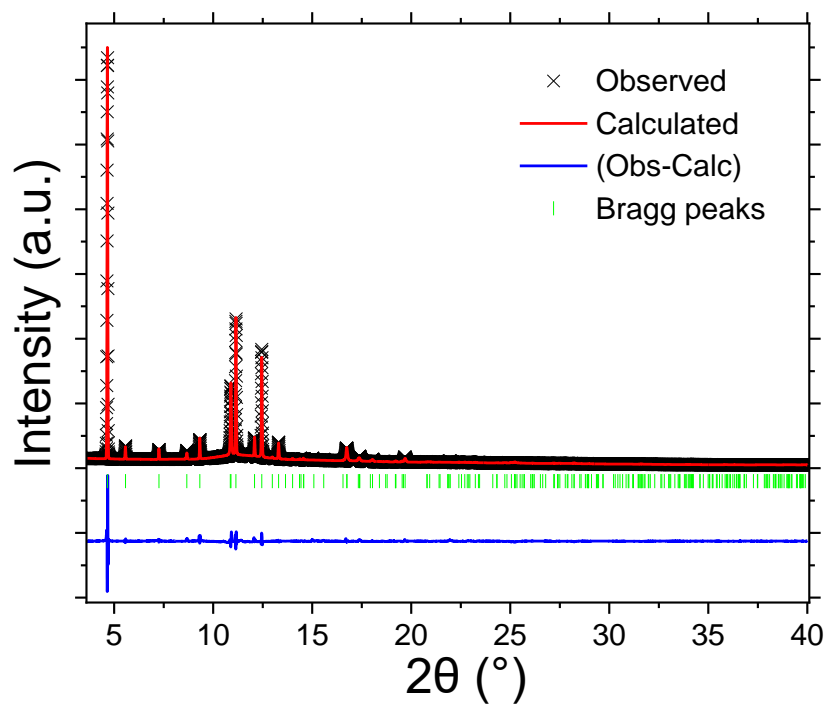

**Fig. S11** Rietveld refinement of phase II of [DBA][BF<sub>4</sub>] at  $T = 270$  K

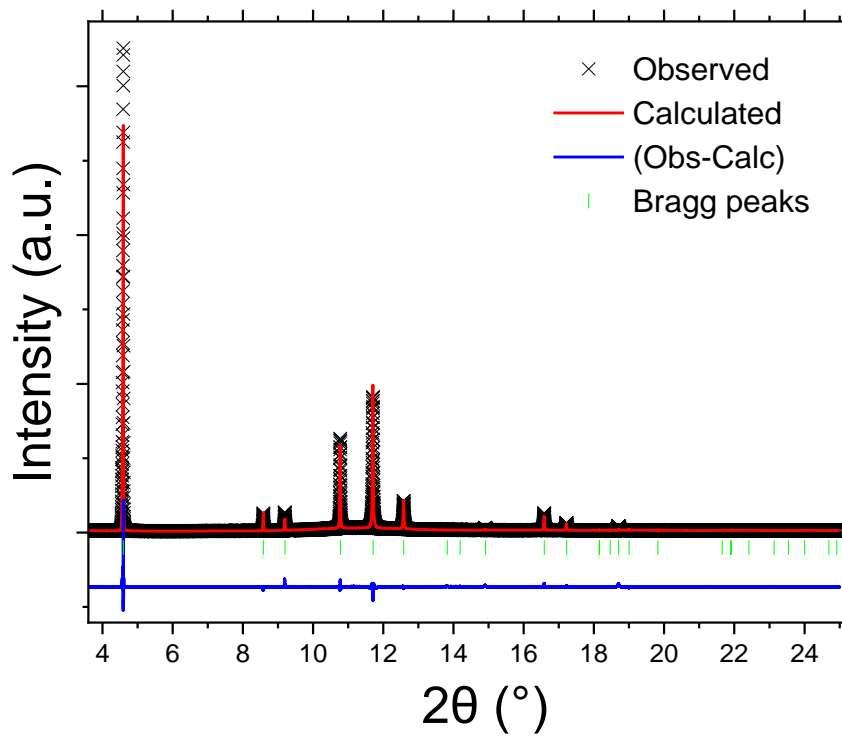

**Fig. S12** Rietveld refinement of phase I of [DBA][BF<sub>4</sub>] at  $T = 300$  K.

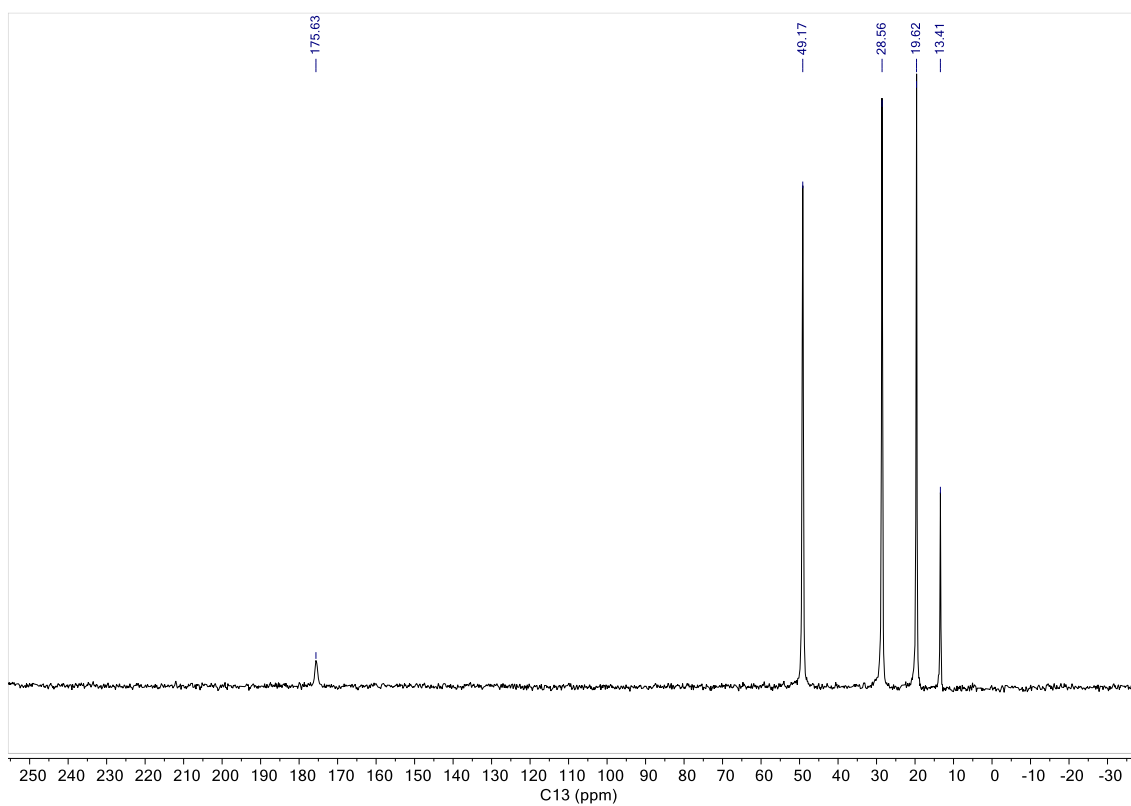

**Fig. S13**  $^{13}\text{C}\{^1\text{H}\}$  CP-MAS spectra of phase I of [DBA][BF<sub>4</sub>] at  $T = 318$  K.



**Table S1.** Data collection, cell and refinement parameters from the single crystal X-ray diffraction studies carried out at  $T = 100$  K and  $T = 240$  K for phases IV and III of [DBA][BF<sub>4</sub>]

|                                         |                                                           |                                                         |
|-----------------------------------------|-----------------------------------------------------------|---------------------------------------------------------|
| <b>Empirical formula</b>                | <b>C<sub>8</sub>H<sub>20</sub>N·BF<sub>4</sub></b>        | <b>C<sub>8</sub>H<sub>20</sub>N·BF<sub>4</sub></b>      |
| <b>Formula weight</b>                   | 217.06                                                    | 217.06                                                  |
| <b>Temperature</b>                      | 100.0(1) K                                                | 240.0(1) K                                              |
| <b>Wavelength</b>                       | 1.54178 Å                                                 | 1.54178 Å                                               |
| <b>Crystal system</b>                   | Orthorhombic                                              | Orthorhombic                                            |
| <b>Space group</b>                      | <i>Ccce</i>                                               | <i>Cmme</i>                                             |
| <b>Unit cell dimensions</b>             | a = 7.3980(5) Å<br>b = 18.4562(11) Å<br>c = 16.8535(10) Å | a = 7.5762(10) Å<br>b = 18.642(3) Å<br>c = 8.5564(12) Å |
| <b>Volume</b>                           | 2301.2(2) Å <sup>3</sup>                                  | 1208.5(3) Å <sup>3</sup>                                |
| <b>Z</b>                                | 8                                                         | 4                                                       |
| <b>Density (calculated)</b>             | 1.253 Mg/m <sup>3</sup>                                   | 1.193 Mg/m <sup>3</sup>                                 |
| <b>Absorption coefficient</b>           | 1.02 mm <sup>-1</sup>                                     | 0.97 mm <sup>-1</sup>                                   |
| <b>F(000)</b>                           | 928                                                       | 464                                                     |
| <b>Crystal size</b>                     | 0.32 x 0.22x 0.08 mm <sup>3</sup>                         | 0.32 x 0.22x 0.08 mm <sup>3</sup>                       |
| <b>Theta range for data collection</b>  | 5.3 to 67.8°                                              | 5.2 to 65.0°.                                           |
| <b>Index ranges</b>                     | 0 ≤ h ≤ 8<br>0 ≤ k ≤ 22<br>0 ≤ l ≤ 20                     | 0 ≤ h ≤ 8<br>0 ≤ k ≤ 21<br>0 ≤ l ≤ 10                   |
| <b>Reflections collected</b>            | 50094                                                     | 13977                                                   |
| <b>Completeness (theta max.)</b>        | 98.7 % (67.76°)                                           | 97.2 % (65.04°)                                         |
| <b>Refinement method</b>                | Full-matrix least-squares on F <sup>2</sup>               | Full-matrix least-squares on F <sup>2</sup>             |
| <b>Data / restraints / parameters</b>   | 1100 / 0 / 69                                             | 629 / 96 / 77                                           |
| <b>Goodness-of-fit on F<sup>2</sup></b> | 1.14                                                      | 1.55                                                    |
| <b>Final R indices [I &gt; 2σ(I)]</b>   | R1 = 0.1091<br>wR2 = 0.3093                               | R1 = 0.1248<br>wR2 = 0.2748                             |
| <b>R indices (all data)</b>             | R1 = 0.1310<br>wR2 = 0.3378                               | R1 = 0.1695<br>wR2 = 0.3096                             |
| <b>Largest diff. peak and hole</b>      | 0.61 and -0.32 e.Å <sup>-3</sup>                          | 0.48 and -0.28 e.Å <sup>-3</sup>                        |

**Table S2.** All the barocaloric materials represented in Fig. 5. *Note:* HOIM = Hybrid Organic-Inorganic Material, SP = Spin Crossover compound, OPC = Organic Plastic Crystal, POL = Polymer, AIS = Ammonium Inorganic Salt and MA = Metal Alloy. *Note2:* 24 and 25 are the same compound due to it has 2 phase transitions.

| Number | Family | Material                                                                          | REF | Number | Family | Material                                                                   | REF |
|--------|--------|-----------------------------------------------------------------------------------|-----|--------|--------|----------------------------------------------------------------------------|-----|
| 1      | HOIM   | (C <sub>10</sub> H <sub>21</sub> NH <sub>3</sub> ) <sub>2</sub> MnCl <sub>4</sub> | 1   | 31     | AIS    | NH <sub>4</sub> I                                                          | 2   |
| 2      | HOIM   | (C <sub>9</sub> H <sub>19</sub> NH <sub>3</sub> ) <sub>2</sub> MnCl <sub>4</sub>  | 3   | 32     | AIS    | (NH <sub>4</sub> ) <sub>2</sub> MoO <sub>2</sub> F <sub>4</sub>            | 4   |
| 3      | HOIM   | (Me <sub>3</sub> S)FeCl <sub>4</sub>                                              | 5   | 33     | MA     | Ni <sub>50</sub> Mn <sub>31.5</sub> Ti <sub>18.5</sub>                     | 6   |
| 4      | HOIM   | (Me <sub>3</sub> (ClMe)N)FeCl <sub>4</sub>                                        | 5   | 34     | MA     | MnNiSi <sub>0.59</sub> FeCoGe <sub>0.41</sub>                              | 7   |
| 5      | HOIM   | (C <sub>9</sub> H <sub>19</sub> NH <sub>3</sub> ) <sub>2</sub> CuBr <sub>4</sub>  | 3   | 35     | MA     | LaFe <sub>11.33</sub> Co <sub>0.47</sub> Si <sub>1.2</sub>                 | 8   |
| 6      | HOIM   | [Me <sub>4</sub> N][Mn(N <sub>3</sub> ) <sub>3</sub> ]                            | 9   | 36     | MA     | Mn <sub>3</sub> NiN                                                        | 10  |
| 7      | HOIM   | [Pr <sub>4</sub> N][Mn(N(CN) <sub>2</sub> ) <sub>3</sub> ]                        | 11  | 37     | MA     | Gd <sub>2</sub> Si <sub>5</sub> Ge <sub>5</sub>                            | 12  |
| 8      | HOIM   | [Pr <sub>4</sub> N][Cd(N(CN) <sub>2</sub> ) <sub>3</sub> ]                        | 13  | 38     | MA     | Ni <sub>0.95</sub> Fe <sub>0.05</sub> S                                    | 14  |
| 9      | HOIM   | [Me <sub>2</sub> NH <sub>2</sub> ][Mg(HCOO) <sub>3</sub> ]                        | 15  | 39     | MA     | Ni <sub>44.6</sub> Co <sub>5.5</sub> Mn <sub>35.5</sub> In <sub>14.4</sub> | 16  |
| 10     | SC     | [FeL <sub>2</sub> ][BF <sub>4</sub> ] <sub>2</sub>                                | 17  | 40     | MA     | Ni <sub>2.00</sub> Mn <sub>1.32</sub> In <sub>0.68</sub>                   | 18  |
| 11     | SC     | [Fe(hyprtz) <sub>3</sub> ] <sub>2</sub> ·H <sub>2</sub> O                         | 19  | 41     | MA     | Co <sub>50</sub> Fe <sub>2.5</sub> V <sub>31.5</sub> Ga <sub>16</sub>      | 20  |
| 12     | SC     | Fe <sub>3</sub> (bntrz) <sub>6</sub> (tcnset) <sub>6</sub>                        | 21  | 42     | MA     | MnNiSi <sub>0.60</sub> FeCoGe <sub>0.40</sub>                              | 22  |
| 13     | SC     | Fe[HB(tz) <sub>3</sub> ] <sub>2</sub>                                             | 23  | 43     | MA     | MnCoGeB <sub>0.03</sub>                                                    | 24  |
| 14     | OPC    | (CH <sub>3</sub> )C(CH <sub>2</sub> OH) <sub>3</sub>                              | 25  | 44     | MA     | Mn <sub>3</sub> GaN                                                        | 26  |
| 15     | OPC    | (CH <sub>3</sub> ) <sub>2</sub> C(CH <sub>2</sub> OH) <sub>2</sub>                | 27  | 45     | MA     | Ni <sub>35.5</sub> Co <sub>14.5</sub> Mn <sub>35</sub> Ti <sub>15</sub>    | 28  |
| 16     | OPC    | C <sub>11</sub> H <sub>18</sub> O                                                 | 29  | 46     | MA     | Ni <sub>49.26</sub> Mn <sub>36.08</sub> In <sub>14.66</sub>                | 7   |
| 17     | OPC    | (CH <sub>3</sub> ) <sub>3</sub> C(CH <sub>2</sub> OH)                             | 25  | 47     | MA     | Ni <sub>0.875</sub> Fe <sub>0.125</sub> S                                  | 14  |
| 18     | OPC    | C <sub>10</sub> H <sub>15</sub> Cl                                                | 30  | 48     | MA     | Ni <sub>0.85</sub> Fe <sub>0.15</sub> S                                    | 14  |
| 19     | OPC    | <i>o</i> -C <sub>2</sub> B <sub>7</sub> H <sub>12</sub>                           | 31  | 49     | MA     | Ni <sub>1.99</sub> Mn <sub>1.34</sub> In <sub>0.67</sub>                   | 18  |
| 20     | OPC    | <i>m</i> -C <sub>2</sub> B <sub>7</sub> H <sub>12</sub>                           | 31  | 50     | MA     | Fe <sub>49</sub> Rh <sub>51</sub>                                          | 32  |
| 21     | OPC    | <i>p</i> -C <sub>2</sub> B <sub>7</sub> H <sub>12</sub>                           | 31  | 51     | MA     | MnCoGe <sub>0.99</sub> In <sub>0.01</sub>                                  | 33  |
| 22     | OPC    | C <sub>10</sub> H <sub>15</sub> Br                                                | 30  | 52     | MA     | MnNiSi <sub>0.61</sub> FeCoGe <sub>0.39</sub>                              | 22  |
| 23     | OPC    | 1- C <sub>10</sub> H <sub>15</sub> O                                              | 29  | 53     | MA     | Ni <sub>0.825</sub> Fe <sub>0.175</sub> S                                  | 14  |
| 24     | OPC    | 2- C <sub>10</sub> H <sub>15</sub> O                                              | 29  | 54     | MA     | Ni <sub>58.3</sub> Mn <sub>17.1</sub> Ga <sub>24.6</sub>                   | 34  |
| 25     | OPC    | 2- C <sub>10</sub> H <sub>15</sub> O                                              | 29  | 55     | MA     | Ni <sub>42.3</sub> Co <sub>7.9</sub> Mn <sub>38.8</sub> Sn <sub>11.0</sub> | 35  |
| 26     | OPC    | C <sub>60</sub>                                                                   | 36  | 56     | MA     | Ni <sub>1.99</sub> Mn <sub>1.37</sub> In <sub>0.64</sub>                   | 18  |
| 27     | POL    | Acetoxy Silicone Rubber                                                           | 37  | 57     | MA     | Ni <sub>2.05</sub> Mn <sub>1.30</sub> In <sub>0.65</sub>                   | 18  |
| 28     | POL    | PVDF-TrFE-CTFE                                                                    | 38  | 58     | MA     | MnNiSi <sub>0.62</sub> FeCoGe <sub>0.38</sub>                              | 22  |
| 29     | AIS    | NH <sub>4</sub> HSO <sub>4</sub>                                                  | 39  | 59     | MA     | Ni <sub>2.02</sub> Mn <sub>1.36</sub> In <sub>0.62</sub>                   | 18  |
| 30     | AIS    | (NH <sub>4</sub> ) <sub>2</sub> NbOF <sub>5</sub>                                 | 40  |        |        |                                                                            |     |

**Table S3.** Atom distances and Rietveld refinement parameters of phase II.Unit cell:  $a = 7.62273$ ,  $b = 20.34391$ ,  $c = 8.51112$ Final refinement:  $wR = 5.92\%$  on 9126 observations in this histogramOther residuals:  $R = 3.45\%$ ,  $R\text{-bkg} = 8.29\%$ ,  $wR\text{-bkg} = 5.92\%$   $wR_{min} = 0.41\%$ 

| <b>Atom<br/>name</b> | <b>x</b> | <b>y</b> | <b>z</b> | <b>Occ.</b> | <b>Uiso</b> |
|----------------------|----------|----------|----------|-------------|-------------|
| N1                   | 0        | 0.75     | 0.27243  | 1           | 0.11078     |
| C2                   | 0        | 0.68191  | 0.20262  | 1           | 0.10748     |
| C3                   | 0        | 0.64166  | 0.29171  | 1           | 0.11633     |
| C4                   | 0        | 0.58008  | 0.18323  | 1           | 0.1233      |
| C5                   | 0.08897  | 0.51155  | 0.29982  | 0.5         | 0.23804     |
| B1_1                 | 0.495    | 0.7494   | 0.2854   | 0.25        | 0.17123     |
| F1_1                 | 0.49964  | 0.68345  | 0.16725  | 0.25        | 0.17313     |
| F2_1                 | 0.33725  | 0.78389  | 0.32159  | 0.25        | 0.30528     |
| F3_1                 | 0.57343  | 0.71161  | 0.42633  | 0.25        | 0.34777     |
| F4_1                 | 0.5873   | 0.79578  | 0.24478  | 0.25        | 0.1503      |

**Table S4.** Atom distances and Rietveld refinement parameters of phase I.Unit Cell:  $a = 5.73161$ ,  $b = 5.73161$ ,  $c = 20.61450$ Final refinement:  $wR = 8.98\%$  on 21501 observations in this histogramOther residuals:  $R = 6.70\%$ ,  $R\text{-bkg} = 8.25\%$ ,  $wR\text{-bkg} = 8.98\%$   $wR_{min} = 3.48\%$ 

| <b>Atom<br/>name</b> | <b>x</b> | <b>y</b> | <b>z</b> | <b>Occ.</b> | <b>Uiso</b> |
|----------------------|----------|----------|----------|-------------|-------------|
| B                    | 0        | 0        | 0.47     | 0.5         | 0.30668     |
| F1                   | 0        | 0        | 0.41     | 0.5         | 0.31835     |
| F2                   | 0.18501  | 0        | 0.5      | 0.25        | 0.39494     |
| N4                   | 0        | 0        | 0        | 1           | 0.92652     |
| C1                   | 0.95817  | 0.04183  | 0.0851   | 0.125       | 0.58818     |
| C2                   | 0.95552  | 0.04448  | 0.12233  | 0.125       | 0.30176     |
| C3                   | 0.91324  | 0.08676  | 0.19077  | 0.125       | 0.4033      |
| C4                   | 0.82974  | 0.17026  | 0.22989  | 0.125       | 0.40361     |

## References

- 1 J. Li, M. Barrio, D. J. Dunstan, R. Dixey, X. Lou, J. L. Tamarit, A. E. Phillips and P. Lloveras, *Adv. Funct. Mater.*, 2021, **31**, 1–8.
- 2 Q. Ren, J. Qi, D. Yu, Z. Zhang, R. Song, W. Song, B. Yuan, T. Wang, W. Ren, Z. Zhang, X. Tong and B. Li, *Nat. Commun.*, 2022, **13**, 1–9.
- 3 Y. Gao, H. Liu, F. Hu, H. Song, H. Zhang, J. Hao, X. Liu, Z. Yu, F. Shen, Y. Wang, H. Zhou, B. Wang, Z. Tian, Y. Lin, C. Zhang, Z. Yin, J. Wang, Y. Chen, Y. Li, Y. Song, Y. Shi, T. Zhao, J. Sun, Q. Huang and B. Shen, *NPG Asia Mater.*, , DOI:10.1038/s41427-022-00378-4.
- 4 M. V. Gorev, E. V. Bogdanov, I. N. Flerov, A. G. Kocharova and N. M. Laptash, *Phys. Solid State*, 2010, **52**, 167–175.
- 5 J. Salgado-Beceiro, J. M. Bermúdez-García, E. Stern-Taulats, J. García-Ben, S. Castro-García, M. Sánchez-Andújar, X. Moya and M. A. Señarís-Rodríguez, *ChemRxiv*, 2021, 17–19.
- 6 A. Aznar, A. Gràcia-Condal, A. Planes, P. Lloveras, M. Barrio, J. L. Tamarit, W. Xiong, D. Cong, C. Popescu and L. Mañosa, *Phys. Rev. Mater.*, 2019, **3**, 1–7.
- 7 L. Mañosa, D. González-Alonso, A. Planes, E. Bonnot, M. Barrio, J. L. Tamarit, S. Aksoy and M. Acet, *Nat. Mater.*, 2010, **9**, 478–481.
- 8 L. Mañosa, D. González-Alonso, A. Planes, M. Barrio, J. L. Tamarit, I. S. Titov, M. Acet, A. Bhattacharyya and S. Majumdar, *Nat. Commun.*, 2011, **2**, 1–5.
- 9 J. Salgado-Beceiro, A. Nonato, R. X. Silva, A. García-Fernández, M. Sánchez-Andújar, S. Castro-García, E. Stern-Taulats, M. A. Señarís-Rodríguez, X. Moya and J. M. Bermúdez-García, *Mater. Adv.*, 2020, **1**, 3167–3170.
- 10 D. Boldrin, E. Mendive-Tapia, J. Zemen, J. B. Staunton, T. Hansen, A. Aznar, J. L. Tamarit, M. Barrio, P. Lloveras, J. Kim, X. Moya and L. F. Cohen, *Phys. Rev. X*, 2018, **8**, 41035.
- 11 J. M. Bermúdez-García, M. Sánchez-Andújar, S. Castro-García, J. López-Beceiro, R. Artiaga and M. A. Señarís-Rodríguez, *Nat. Commun.*, , DOI:10.1038/ncomms15715.
- 12 S. Yuce, M. Barrio, B. Emre, E. Stern-Taulats, A. Planes, J. L. Tamarit, Y. Mudryk, K. A. Gschneidner, V. K. Pecharsky and L. Mañosa, *Appl. Phys. Lett.*, , DOI:10.1063/1.4745920.
- 13 J. M. Bermúdez-García, S. Yáñez-Vilar, A. García-Fernández, M. Sánchez-Andújar, S. Castro-García, J. López-Beceiro, R. Artiaga, M. Dilshad, X. Moya and M. A. Señarís-Rodríguez, *J. Mater. Chem. C*, 2018, **6**, 9867–9874.

- 14 J. Lin, P. Tong, X. Zhang, Z. Wang, Z. Zhang, B. Li, G. Zhong, J. Chen, Y. Wu, H. Lu, L. He, B. Bai, L. Ling, W. Song, Z. Zhang and Y. Sun, *Mater. Horizons*, 2020, **7**, 2690–2695.
- 15 M. Szafranski, W. J. Wei, Z. M. Wang, W. Li and A. Katrusiak, *APL Mater.*, , DOI:10.1063/1.5049116.
- 16 X. He, S. Wei, Y. Kang, Y. Zhang, Y. Cao, K. Xu, Z. Li and C. Jing, *Scr. Mater.*, 2018, **145**, 58–61.
- 17 S. P. Vallone, A. N. Tantillo, A. M. dos Santos, J. J. Molaison, R. Kulmaczewski, A. Chapoy, P. Ahmadi, M. A. Halcrow and K. G. Sandeman, *Adv. Mater.*, 2019, **31**, 1–7.
- 18 E. Stern-Taulats, A. Planes, P. Lloveras, M. Barrio, J. L. Tamarit, S. Pramanick, S. Majumdar, S. Yüce, B. Emre, C. Frontera and L. Mañosa, *Acta Mater.*, 2015, **96**, 324–332.
- 19 P. J. Von Ranke, B. P. Alho, R. M. Ribas, E. P. Nobrega, A. Caldas, V. S. R. De Sousa, M. V. Colaço, L. F. Marques, D. L. Rocco and P. O. Ribeiro, *Phys. Rev. B*, 2018, **98**, 2–6.
- 20 H. Liu, Z. Li, Y. Zhang, Z. Ni, K. Xu and Y. Liu, *Scr. Mater.*, 2020, **177**, 1–5.
- 21 M. Romanini, Y. Wang, G. Kübra, G. Ornelas, P. Lloveras, Y. Zhang, W. Zheng, M. Barrio, A. Aznar, A. Gràcia-Condal, B. Emre, O. Atakol, C. Popescu, H. Zhang, Y. Long, L. Balicas, J. L. Tamarit, A. Planes, M. Shatruk and L. Mañosa, *Adv. Mater.*, 2021, **33**, 2008076.
- 22 P. Lloveras, T. Samanta, M. Barrio, I. Dubenko, N. Ali, J. L. Tamarit and S. Stadler, *APL Mater.*, 2019, **7**, 0–9.
- 23 J. Seo, J. D. Braun, V. M. Dev and J. A. Mason, *J. Am. Chem. Soc.*, 2022, **144**, 6493–6503.
- 24 A. Aznar, P. Lloveras, J. Y. Kim, E. Stern-Taulats, M. Barrio, J. L. Tamarit, C. F. Sánchez-Valdés, J. L. Sánchez Llamazares, N. D. Mathur and X. Moya, *Adv. Mater.*, 2019, **31**, 1–6.
- 25 A. Aznar, P. Lloveras, M. M. Barrio, P. Negrier, A. Planes, L. L. Mañosa, N. D. Mathur, X. Moya and J. L. L. Tamarit, *J. Mater. Chem. A*, 2020, **8**, 639–647.
- 26 D. Matsunami, A. Fujita, K. Takenaka and M. Kano, *Nat. Mater.*, 2015, **14**, 73–78.
- 27 P. Lloveras, A. Aznar, M. Barrio, P. Negrier, C. Popescu, A. Planes, L. Mañosa, E. Stern-Taulats, A. Avramenko, N. D. Mathur, X. Moya and J. L. Tamarit, *Nat. Commun.*, 2019, **10**, 1–7.
- 28 Z. Wei, Y. Shen, Z. Zhang, J. Guo, B. Li, E. Liu, Z. Zhang and J. Liu, *APL Mater.*, ,

DOI:10.1063/5.0005021.

- 29 A. Salvatori, P. Negrier, A. Aznar, M. Barrio, J. L. Tamarit and P. Lloveras, , DOI:10.1063/5.0127667.
- 30 A. Aznar, P. Negrier, A. Planes, L. Mañosa, E. Stern-Taulats, X. Moya, M. Barrio, J. L. Tamarit and P. Lloveras, *Appl. Mater. Today*, 2021, **23**, 101023.
- 31 K. Zhang, R. Song, J. Qi, Z. Zhang, Z. Zhang, C. Yu, K. Li, Z. Zhang and B. Li, *Adv. Funct. Mater.*, , DOI:10.1002/adfm.202112622.
- 32 E. Stern-Taulats, A. Planes, P. Lloveras, M. Barrio, J. L. Tamarit, S. Pramanick, S. Majumdar, C. Frontera and L. Mañosa, *Phys. Rev. B - Condens. Matter Mater. Phys.*, 2014, **89**, 1–8.
- 33 R. R. Wu, L. F. Bao, F. X. Hu, H. Wu, Q. Z. Huang, J. Wang, X. L. Dong, G. N. Li, J. R. Sun, F. R. Shen, T. Y. Zhao, X. Q. Zheng, L. C. Wang, Y. Liu, W. L. Zuo, Y. Y. Zhao, M. Zhang, X. C. Wang, C. Q. Jin, G. H. Rao, X. F. Han and B. G. Shen, *Sci. Rep.*, 2015, **5**, 1–11.
- 34 X. J. He, K. Xu, S. X. Wei, Y. L. Zhang, Z. Li and C. Jing, *J. Mater. Sci.*, 2017, **52**, 2915–2923.
- 35 X. He, Y. Kang, S. Wei, Y. Zhang, Y. Cao, K. Xu, Z. Li, C. Jing and Z. Li, *J. Alloys Compd.*, 2018, **741**, 821–825.
- 36 J. Li, D. Dunstan, X. Lou, A. Planes, L. Mañosa, M. Barrio, J. L. Tamarit and P. Lloveras, *J. Mater. Chem. A*, 2020, **8**, 20354–20362.
- 37 W. Imamura, É. O. Usuda, L. S. Paixão, N. M. Bom, A. M. Gomes and A. M. G. Carvalho, *Chinese J. Polym. Sci. (English Ed.)*, 2020, **38**, 999–1005.
- 38 E. O. Usuda, N. M. Bom and A. M. G. Carvalho, *Eur. Polym. J.*, 2017, **92**, 287–293.
- 39 P. J. von Ranke, B. P. Alho and P. O. Ribeiro, *J. Alloys Compd.*, 2018, **749**, 556–560.
- 40 M. V. Gorev, E. V. Bogdanov, I. N. Flerov, V. N. Voronov and N. M. Laptash, *Ferroelectrics*, 2010, **397**, 76–80.
